# Supplementary material
Source: PubMed Central journal article supplement (PMC7489303)
Supplement: NIHMS1624295-supplement-1.pdf [file NIHMS1624295-supplement-1.pdf]

## Supplementary Information

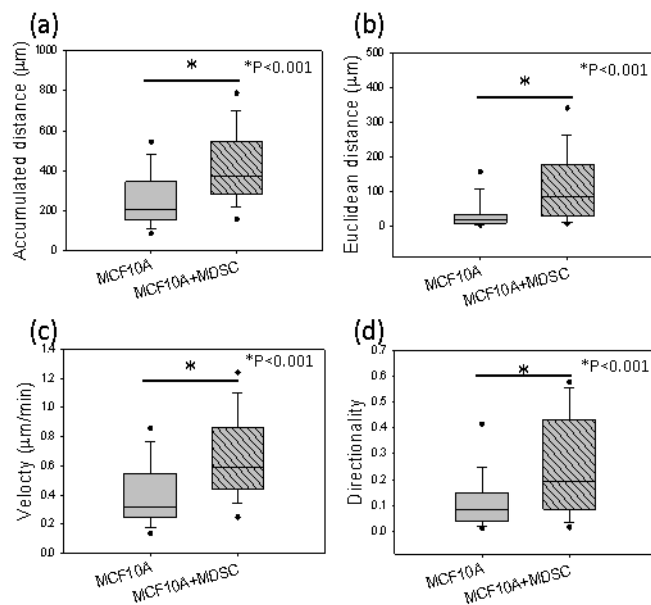

**Figure S1.**

**Migration of human cancer cell line in co-culture with patient derived MDSCs.** Patient-derived MDSCs were co-cultured with human breast cancer cells (MCF10A) on aligned PDMS matrices. Cell migration was monitored over 24 hours via time-lapse microscopy. The MCF10A cells, which are epithelial in nature, do not exhibit a highly migratory phenotype; however, when co-cultured with patient-derived MDSCs, the MCF10A showed a significant increase in migration **(a)** accumulated distance, **(b)** Euclidean distance, **(c)** velocity and **(d)** directionality.
